# Supplementary material for: Allopregnanolone Is Associated with a Stress-Induced Reduction of Heart Rate Variability in Premenstrual Dysphoric Disorder
Source: MDPI journal article supplement (doi:10.3390/jcm12041553), 2023-02-16
Supplement: s1 [file s1]

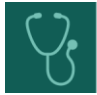

**Supplementary Table S1.** HRV Time Comparisons for the Overall Participant Sample.

| Contrast                | Estimate | SE    | df | t.ratio | p.value   |
|-------------------------|----------|-------|----|---------|-----------|
| Baseline vs Instruction | 0.436    | 0.156 | 99 | 2.792   | 0.031*    |
| Baseline vs Speech      | 0.659    | 0.156 | 99 | 4.216   | 0.0003*** |
| Baseline vs Recovery    | 0.138    | 0.156 | 99 | 0.881   | 0.81      |
| Instruction vs Speech   | 0.223    | 0.156 | 99 | 1.424   | 0.48      |
| Instruction vs Recovery | -0.299   | 0.156 | 99 | -1.911  | 0.23      |
| Speech vs Recovery      | -0.521   | 0.156 | 99 | -3.335  | 0.0065**  |

\* $p \leq 0.05$ ; \*\* $p \leq 0.01$ ; \*\*\* $p \leq 0.001$ .

**Supplementary Table S2.** HRV Time Comparisons for the Partial Participant Sample.

| Contrast                | Estimate | SE   | df | t.ratio | p.value           |
|-------------------------|----------|------|----|---------|-------------------|
| Baseline vs Instruction | 0.43     | 0.17 | 81 | 2.48    | 0.07 <sup>#</sup> |
| Baseline vs Speech      | 0.62     | 0.17 | 81 | 3.59    | 0.003**           |
| Baseline vs Recovery    | 0.14     | 0.17 | 81 | 0.81    | 0.85              |
| Instruction vs Speech   | 0.19     | 0.17 | 81 | 1.11    | 0.69              |
| Instruction vs Recovery | -0.29    | 0.17 | 81 | -1.68   | 0.34              |
| Speech vs Recovery      | -0.48    | 0.17 | 81 | -2.79   | 0.03*             |

<sup>#</sup>marginal, \* $p \leq 0.05$ ; \*\* $p \leq 0.01$ ; \*\*\* $p \leq 0.001$ ; Please refer to Supplementary Table 1 for comparison of these results in the full sample.

**Supplementary Table S3.** Mean, SD, and SEM of HRV Values According to Groups and Timepoints.

| Timepoint   | Group   | n  | Mean | SD   | SEM  |
|-------------|---------|----|------|------|------|
| Baseline    | PMDD    | 17 | 6.60 | 1.05 | 0.25 |
| Baseline    | Healthy | 18 | 6.57 | 1.16 | 0.27 |
| Instruction | PMDD    | 17 | 5.92 | 1.10 | 0.27 |
| Instruction | Healthy | 18 | 6.37 | 0.90 | 0.21 |
| Speech      | PMDD    | 17 | 5.80 | 1.30 | 0.32 |
| Speech      | Healthy | 18 | 6.05 | 0.95 | 0.22 |
| Recovery    | PMDD    | 17 | 6.20 | 1.10 | 0.27 |
| Recovery    | Healthy | 18 | 6.69 | 0.81 | 0.19 |

**Supplementary Table S4.** HRV Changes Across TSST Timepoints According to Diagnosis in the Partial Sample.

| PMDD                    |          |      |    |         |                   |
|-------------------------|----------|------|----|---------|-------------------|
| Contrast                | Estimate | SE   | df | t.ratio | p.value           |
| Baseline vs Instruction | 0.70     | 0.26 | 81 | 2.72    | 0.04*             |
| Baseline vs TSST        | 0.75     | 0.26 | 81 | 2.90    | 0.02*             |
| Baseline vs Recovery    | 0.36     | 0.26 | 81 | 1.40    | 0.50              |
| Instruction vs TSST     | 0.05     | 0.26 | 81 | 0.18    | 1.00              |
| Instruction vs Recovery | -0.34    | 0.26 | 81 | -1.31   | 0.56              |
| TSST vs Recovery        | -0.39    | 0.26 | 81 | -1.49   | 0.45              |
| Healthy                 |          |      |    |         |                   |
| Baseline vs Instruction | 0.16     | 0.23 | 81 | 0.70    | 0.90              |
| Baseline vs TSST        | 0.50     | 0.23 | 81 | 2.15    | 0.15              |
| Baseline vs Recovery    | -0.08    | 0.23 | 81 | -0.35   | 0.99              |
| Instruction vs TSST     | 0.34     | 0.23 | 81 | 1.46    | 0.47              |
| Instruction vs Recovery | -0.24    | 0.23 | 81 | -1.05   | 0.72              |
| TSST vs Recovery        | -0.58    | 0.23 | 81 | -2.51   | 0.07 <sup>#</sup> |

<sup>#</sup>marginal, \* $p \leq 0.05$ ; \*\* $p \leq 0.01$ ; All contrasts were adjusted by the Tuckey method for comparing a family of 4 estimates; Please refer to Table 2 for comparison of these results in the full sample.

**Supplementary Table S5.** Mean, SD, and SEM of Allopregnanolone Concentration (ng/mL) Accord-ing to Groups and Timepoints in the full sample.

| Timepoint | Group   | n  | Mean | SD   | SEM  |
|-----------|---------|----|------|------|------|
| -20       | PMDD    | 16 | 1.13 | 0.71 | 0.18 |
| -20       | Healthy | 16 | 1.79 | 1.77 | 0.44 |
| 20        | PMDD    | 14 | 1.22 | 0.56 | 0.15 |
| 20        | Healthy | 16 | 1.69 | 1.31 | 0.33 |
| 30        | PMDD    | 14 | 1.12 | 0.55 | 0.15 |
| 30        | Healthy | 16 | 1.79 | 1.38 | 0.34 |
| 40        | PMDD    | 15 | 1.17 | 0.49 | 0.13 |
| 40        | Healthy | 16 | 1.79 | 1.35 | 0.34 |
| 50        | PMDD    | 15 | 1.24 | 0.70 | 0.18 |
| 50        | Healthy | 16 | 1.70 | 1.28 | 0.32 |
| 65        | PMDD    | 15 | 1.22 | 0.65 | 0.17 |
| 65        | Healthy | 16 | 1.66 | 1.28 | 0.32 |
| 90        | PMDD    | 14 | 1.10 | 0.56 | 0.15 |
| 90        | Healthy | 15 | 1.66 | 1.06 | 0.27 |
